# Supplementary material for: Extensive Alternative Splicing of KIR Transcripts
Source: Front Immunol. 2018 Dec 4;9:2846. doi: 10.3389/fimmu.2018.02846 (PMC6288254; doi:10.3389/fimmu.2018.02846)
Supplement: Supplementary Table 1 — Eighteen different splice events were observed for human KIR. For each KIR gene for which a splice event was observed, an accession number is listed. [file Table_1.XLSX]

## Sheet: Supp. Table 1
Supplementary table 1
Eighteen different splice events were observed for human KIR. For each KIR gene for which a splice event was observed, an accession number is listed.
Splice mechanism	Insertion/deletion size	Gene	Accession number
Exon skipping	Deletion 294 bp (exon 5)	2DL2	LS974084
		2DL3	LS974085
		2DL5	LS974086
		3DL1	LS974087
	Deletion 51 bp (exon 6)	2DL1	LS974078
		2DL3	LS974079
		2DL4	LS974080
		2DS2	LS974081
		2DS4	LS974082
		3DL2	LS974083
	Deletion 104/105 bp (exon 7)	2DL4	LS974091, LS974092
		3DL2	LS974090
	Deletion 594 bp (exons 4 + 5)	3DL1	LS974088
		3DL3	LS974089
	Deletion 155/156 bp (exons 6 + 7)	2DL4	LS974093 ,LS974095
		3DL2	LS974094
	Deletion 158 bp (exons 7 + 8)	2DL4	LS974097
	Deletion 209 bp (exons 6 + 7 + 8)	2DL4	LS974096
Alternative 3' ss	Deletion 150 bp	2DL3	LS974098
	Inclusion 49 bp	2DL1	LS974099
	Inclusion 170 bp	3DL1	LS974100
Alternative 5' ss	Deletion 66 bp	2DL4	LS974103
	Deletion 73/74 bp	2DL4	LS974105, LS974104
	Deletion 198 bp	2DL4	LS974106
	Inclusion 67 bp	2DL4	LS974101
	Inclusion 129 bp	3DL2	LS974102
Alternative 3' + 5' ss	Deletion 294 bp	2DL3	LS974108
		2DS4	LS974107
		3DL1	LS974110
		3DL2	LS974109
Cryptic exon	Inclusion 78 bp	2DL1	LS974111
		2DL2	LS974112
		2DL3	LS974113
		2DS1	LS974114
	Inclusion 54/57 bp	2DL1	LS974115
		2DS1	LS974117
		2DS4	LS974077
		2DS5	LS974116

## Sheet: Supp. Table 2
Supplementary table 2
Twenty-nine different splice events were observed for rhesus macaque KIR. For each KIR gene for which a splice event was observed, an accession number is listed.
Splice mechanism	Insertion/deletion size	Gene	Accession number
Exon skipping	Deletion 300 bp (exon 4)	3DL05	LR030267
		3DS05	LR030254
	Deletion 294 bp (exon 5)	3DL01	LR030249, LR030461
		3DL02	LR030261
		3DL05	LR030491
		3DL07	LR030266
		3DL10	LR030478
		3DL10A/3DL02	LR030248
	Deletion 51 bp (exon 6)	2DL04	LR030486
	Deletion 53 bp (exon 8)	2DL04	LR030481
	Deletion 594 bp (exon 4 + 5)	3DL07	LR030255
		3DL20	LR030240
	Deletion 446 bp (exon 5 + 6 + 7)	3DL01	LR030258
		3DL05	LR030463
		3DL07	LR030492
		3DL10	LR030259
		3DL10A/3DL02	LR030253
	Deletion 115 bp (exon 6 + 7)	2DL04	LR030490
Alternative 3' ss	Deletion 36 bp	3DL01	LR030242
		3DL02	LR030495
		3DL05	LR030477, LR030494
		3DL07	LR030264
		3DL08	LR030260
		3DL10	LR030466, LR030469
		3DS01	LR030505
		3DS02	LR030268
		3DS03	LR030503
		3DS05	LR030251
		3DSw08	LR030493
		3DL02/3DL08A	LR030504
		3DL20	LR030472
	Deletion 216 bp	3DL02	LR030496
		3DL08	LR030245
		3DS05	LR030252
		3DSw08	LR030474
		3DL02/3DL08A	LR030243
	Deletion 267 bp	3DL05	LR030497
		3DS05	LR030462
	Deletion 27 bp	2DL04	LR030487
	Deletion 115 bp	3DL07	LR030265
		3DL08	LR030471
		3DL10	LR030479
		3DS03	LR030262
		3DL02/3DL08A	LR030247
		3DL10A/3DL02	LR030241
		3DL20	LR030464
	Deletion 150 bp	3DL02	LR030498
		3DLw03	LR030476
		3DL10	LR030480
	Deletion 176 bp	3DL07	LR030256
		3DL10A/3DL02	LR030250
	Inclusion 109 bp (Ex. 7)	2DL04	LR030483
	Inclusion 147 bp (Ex. 7)	2DL04	LR030488
	Inclusion 245/246 bp	3DL07	LR030263
		2DL04	LR030489
Alternative 5' ss	Deletion 198 bp	3DL02	LR030499
		3DS05	LR030467
		3DL02/3DL08A	LR030244
	Inclsuion 109 bp (Ex. 3)	2DL04	LR030484
Alternative 3' and 5' ss	Deletion 81 bp	3DS02	LR030502
	Deletion 107 bp	3DS02	LR030501
	Deletion 141 bp	3DL08	LR030473
		3DSw08	LR030475
		3DL02/3DL08A	LR030246
	Deletion 414 bp	3DS05	LR030500
	Deletion 324 bp	3DL20	LR030468
Exon skipping and alt. 3' ss	Deletion 415 bp	3DL20	LR030465
Cryptic exon	Inclusion 88 bp	3DL01	LR030470
	Inclusion 147 bp (Ex. 5)	2DL04	LR030485
	Inclusion 47 bp	3DL07	LR030257
Intron retention	Inclusion 98/99 bp	2DL04	LR030482

## Sheet: Supp. Table 3
Supplementary table 3
Primer sets to amplify human and macaque intron sequences. In human, two generic primer sets amplified most KIR2D genes. In macaques, different primer sets were used to amplify certain regions of different KIR genes.
Macaque
Gene	Region	Forward	Reverse	Annealing temp. (C°)	# of cycli
KIR3DL	Exon 6 to exon 9	TCACCCACTGAACCAAGCTC	ACAYGCTGGTATCTGTTGGG	62	30
KIR3DL	Intron 4 to exon 9	TGGGGAAGTGAGGTCAGAGA	ACACGCTGGTATCTGTTGGG	62	32
KIR2DL04	Exon 5 to exon 9	ACATTCCAGGCTGACTTCCC	GCTGTGAAGCCGGTTTTGAG	62	32
KIR3DL01	Exon 5 to exon 9	TGACCTTGTCCTGCAGTTCC	GCTGTGAAGCCGGTTTTGAG	62	32
KIR3DL20	Exon 1 to intron 4	GCRTGTGTTGGGTTCTTCTTG	TCCTGTTTCTCTACCTCTGTTGGT	62	32
Human
Gene	Region	Forward	Reverse	Annealing temp. (C°)	# of cycli
KIR2DL	Exon 6 to exon 9	TCACCCACTGAACCAAGCTC	GGGCAGGAGACAACTTTGGA	60	32
KIR2DS	Exon 6 to exon 9	TCACCCACTGAACCAAGCTC	TGCGTATGACACCTCCTGATG	60	32

## Sheet: Supp. Table 4
Supplementary table 4
The Maximum Entropy Modeling Scan (MaxEntScan; MES) (68), the Position Weight Matrix (PWM) via SpliceView (69), and the Human Splice Finder (HSF) were used to predict most splicing strenght scores. If these tools failed to provide a splicing strenght score, the Weight Matrix Model (WMM) (68) and NNSplice tool (71) were used. The definition of the 3' and 5' splice site could differ between the dif…
Software tool	3' ss definition	5' ss definition	Splice strenght score range	Additional elements
MES	-20 to +3	-3 to +6	-20 to +20	-
PWM	-9 to +4	-3 to +6	0 to 100	-
HSF	-12 to +2	-3 to +6	0 to 100	BPS, ESE, ESS
WMM	-20 to +3	-3 to +6	-20 to +20	-
NNSplice tool	-21 to +20	-7 to +8	0 to 1	-
